# Supplementary material for: OakRootRNADB—a consolidated RNA-seq database for coding and noncoding RNA in roots of pedunculate oak (Quercus robur)
Source: Oxford University Press journal article supplement (doi:10.1093/database/baac097), 2022-01-01
Supplement: baac097_supp.zip [file Supplementary Table 1.xlsx]

## Sheet: Arkusz1
Supplementary Table 1. Primers and UPL (Universal Probe Library) probes used in the RT-qPCR analysis.
Gene	Gene ID	Primer	Sequence (5’ → 3’)	UPL probe
CERD	MSTRG.1646	forward	TTGCTGCTGGAACAACAGAT	31
		reverse	TTCCCTTGTCATCTCCTTGC
G3OX	MSTRG.22681	forward	CGGACCCGTTATCGTTTATC	20
		reverse	TTTTGAGAGTGGAGAGATTTGGA
WRKY	MSTRG.4799	forward	CCCACGCTACCAATTTGATT	9
		reverse	TGCTGTTGTTGTTGTGTTTCTG
GST	MSTRG.31078	forward	TGAATCTAGGGCAATTACAGCA	5
		reverse	GAGATCAGTTCCAGTTTCCTTGA
PIN2	MSTRG.5844	forward	TCTTCACACCAGACCAGTGC	5
		reverse	GGAAGGAAAGTAATGGAACTGC
GERL1	MSTRG.23367	forward	CCAACCCTCCCATTAATCCT	97
		reverse	CTCTTCAACCACATTTTTGTCG
ACO5	MSTRG.13653	forward	CGGCAAGTTGGAGAATGTG	88
		reverse	GCTGGCCACTCGTTATTGTC
ACO1	MSTRG.24659	forward	GTAAGTAATTCCATTTTGACAATCCA	31
		reverse	CCTACACTAGAAGTGAGATCCATCC
PCC13	MSTRG.32141	forward	CTCTATGAGAGAGCCGAAGAAAA	145
		reverse	CGAGAGATATAGTCTGTGAACTGTGC
UBQ	MSTRG.26207	forward	CTTTCCCAAATTTATTCGTTGG	9
		reverse	TCTATTGACAAGCCACTGTTTCA
EF	MSTRG.28793	forward	CACCTCTTGGTCGTTTTGCT	5
		reverse	TTCTCAACACTCTTGATGACACC
