# Supplementary material for: OakRootRNADB—a consolidated RNA-seq database for coding and noncoding RNA in roots of pedunculate oak (Quercus robur)
Source: Oxford University Press journal article supplement (doi:10.1093/database/baac097), 2022-01-01
Supplement: baac097_supp.zip [file Supplementary Table 2.xlsx]

## Sheet: Arkusz1
Supplementary Table 2. Data deposited in NCBI GEO and the OakRootRNADB.
Sample name	title	source name	organism	molecule	description
1K_dl_NN_kon_rep_1	1K_dl_NN_kon_rep_1	root	Quercus robur	total RNA	First harvest date - 7-weeks old plant, meristematic zone of the taproot, short root, growing in containers
1K_dl_NN_kon_rep_2	1K_dl_NN_kon_rep_2	root	Quercus robur	total RNA	First harvest date - 7-weeks old plant, meristematic zone of the taproot, short root, growing in containers
1K_dl_NN_kon_rep_3	1K_dl_NN_kon_rep_3	root	Quercus robur	total RNA	First harvest date - 7-weeks old plant, meristematic zone of the taproot, short root, growing in containers
1K_dl_NT_kon_rep_1	1K_dl_NT_kon_rep_1	root	Quercus robur	total RNA	First harvest date - 7-weeks old plant, meristematic zone of the taproot, long root, dying root, growing in containers
1K_dl_NT_kon_rep_2	1K_dl_NT_kon_rep_2	root	Quercus robur	total RNA	First harvest date - 7-weeks old plant, meristematic zone of the taproot, long root, dying root, growing in containers
1K_dl_NT_kon_rep_3	1K_dl_NT_kon_rep_3	root	Quercus robur	total RNA	First harvest date - 7-weeks old plant, meristematic zone of the taproot, long root, dying root, growing in containers
1K_kr_NN_kon_rep_1	1K_kr_NN_kon_rep_1	root	Quercus robur	total RNA	First harvest date - 7-weeks old plant, meristematic zone of the taproot, short root, growing in containers
1K_kr_NN_kon_rep_2	1K_kr_NN_kon_rep_2	root	Quercus robur	total RNA	First harvest date - 7-weeks old plant, meristematic zone of the taproot, short root, growing in containers
1K_kr_NN_kon_rep_3	1K_kr_NN_kon_rep_3	root	Quercus robur	total RNA	First harvest date - 7-weeks old plant, meristematic zone of the taproot, short root, growing in containers
1K_sr_NN_kon_rep_1	1K_sr_NN_kon_rep_1	root	Quercus robur	total RNA	First harvest date - 7-weeks old plant, meristematic zone of the taproot, medium root, growing in containers
1K_sr_NN_kon_rep_2	1K_sr_NN_kon_rep_2	root	Quercus robur	total RNA	First harvest date - 7-weeks old plant, meristematic zone of the taproot, medium root, growing in containers
1K_sr_NN_kon_rep_3	1K_sr_NN_kon_rep_3	root	Quercus robur	total RNA	First harvest date - 7-weeks old plant, meristematic zone of the taproot, medium root, growing in containers
1KB_dl_NN_kon_rep_1	1KB_dl_NN_kon_rep_1	root	Quercus robur	total RNA	First harvest date - 7-weeks old plant, lateral root, long root, growing in containers
1KB_dl_NN_kon_rep_2	1KB_dl_NN_kon_rep_2	root	Quercus robur	total RNA	First harvest date - 7-weeks old plant, lateral root, long root, growing in containers
1KB_dl_NN_kon_rep_3	1KB_dl_NN_kon_rep_3	root	Quercus robur	total RNA	First harvest date - 7-weeks old plant, lateral root, long root, growing in containers
1KB_sr_NN_kon_rep_1	1KB_sr_NN_kon_rep_1	root	Quercus robur	total RNA	First harvest date - 7-weeks old plant, lateral root, medium root, growing in containers
1KB_sr_NN_kon_rep_2	1KB_sr_NN_kon_rep_2	root	Quercus robur	total RNA	First harvest date - 7-weeks old plant, lateral root, medium root, growing in containers
1KB_sr_NN_kon_rep_3	1KB_sr_NN_kon_rep_3	root	Quercus robur	total RNA	First harvest date - 7-weeks old plant, lateral root, medium root, growing in containers
2K_dl_NN_kon_rep_1	2K_dl_NN_kon_rep_1	root	Quercus robur	total RNA	Second harvest date - 8-weeks old plant, meristematic zone of the taproot, long root, growing in containers
2K_dl_NN_kon_rep_2	2K_dl_NN_kon_rep_2	root	Quercus robur	total RNA	Second harvest date - 8-weeks old plant, meristematic zone of the taproot, long root, growing in containers
2K_dl_NN_kon_rep_3	2K_dl_NN_kon_rep_3	root	Quercus robur	total RNA	Second harvest date - 8-weeks old plant, meristematic zone of the taproot, long root, growing in containers
2K_dl_NN_rh_rep_1	2K_dl_NN_rh_rep_1	root	Quercus robur	total RNA	Second harvest date - 8-weeks old plant, meristematic zone of the taproot, long root, growing in rhizotron
2K_dl_NN_rh_rep_2	2K_dl_NN_rh_rep_2	root	Quercus robur	total RNA	Second harvest date - 8-weeks old plant, meristematic zone of the taproot, long root, growing in rhizotron
2K_dl_NN_rh_rep_3	2K_dl_NN_rh_rep_3	root	Quercus robur	total RNA	Second harvest date - 8-weeks old plant, meristematic zone of the taproot, long root, growing in rhizotron
2K_dl_NT_kon_rep_1	2K_dl_NT_kon_rep_1	root	Quercus robur	total RNA	Second harvest date - 8-weeks old plant, meristematic zone of the taproot, long root, dying root, growing in containers
2K_dl_NT_kon_rep_2	2K_dl_NT_kon_rep_2	root	Quercus robur	total RNA	Second harvest date - 8-weeks old plant, meristematic zone of the taproot, long root, dying root, growing in containers
2K_dl_NT_kon_rep_3	2K_dl_NT_kon_rep_3	root	Quercus robur	total RNA	Second harvest date - 8-weeks old plant, meristematic zone of the taproot, long root, dying root, growing in containers
2K_kr_NN_kon_rep_1	2K_kr_NN_kon_rep_1	root	Quercus robur	total RNA	Second harvest date - 8-weeks old plant, meristematic zone of the taproot, short root, growing in containers
2K_kr_NN_kon_rep_2	2K_kr_NN_kon_rep_2	root	Quercus robur	total RNA	Second harvest date - 8-weeks old plant, meristematic zone of the taproot, short root, growing in containers
2K_kr_NN_kon_rep_3	2K_kr_NN_kon_rep_3	root	Quercus robur	total RNA	Second harvest date - 8-weeks old plant, meristematic zone of the taproot, short root, growing in containers
2K_sr_NN_kon_rep_1	2K_sr_NN_kon_rep_1	root	Quercus robur	total RNA	Second harvest date - 8-weeks old plant, meristematic zone of the taproot, medium root, growing in containers
2K_sr_NN_kon_rep_2	2K_sr_NN_kon_rep_2	root	Quercus robur	total RNA	Second harvest date - 8-weeks old plant, meristematic zone of the taproot, medium root, growing in containers
2K_sr_NN_kon_rep_3	2K_sr_NN_kon_rep_3	root	Quercus robur	total RNA	Second harvest date - 8-weeks old plant, meristematic zone of the taproot, medium root, growing in containers
2K_sr_NN_rh_rep_1	2K_sr_NN_rh_rep_1	root	Quercus robur	total RNA	Second harvest date - 8-weeks old plant, meristematic zone of the taproot, medium root, growing in rhizotron
2K_sr_NN_rh_rep_2	2K_sr_NN_rh_rep_2	root	Quercus robur	total RNA	Second harvest date - 8-weeks old plant, meristematic zone of the taproot, medium root, growing in rhizotron
2K_sr_NN_rh_rep_3	2K_sr_NN_rh_rep_3	root	Quercus robur	total RNA	Second harvest date - 8-weeks old plant, meristematic zone of the taproot, medium root, growing in rhizotron
2K_sr_NT_rh_rep_1	2K_sr_NT_rh_rep_1	root	Quercus robur	total RNA	Second harvest date - 8-weeks old plant, meristematic zone of the taproot, medium root, dying root, growing in rhizotron
2K_sr_NT_rh_rep_2	2K_sr_NT_rh_rep_2	root	Quercus robur	total RNA	Second harvest date - 8-weeks old plant, meristematic zone of the taproot, medium root, dying root, growing in rhizotron
2K_sr_NT_rh_rep_3	2K_sr_NT_rh_rep_3	root	Quercus robur	total RNA	Second harvest date - 8-weeks old plant, meristematic zone of the taproot, medium root, dying root, growing in rhizotron
2K_sr_TN_kon_rep_1	2K_sr_TN_kon_rep_1	root	Quercus robur	total RNA	Second harvest date - 8-weeks old plant, meristematic zone of the taproot, medium root, thick root, growing in containers
2K_sr_TN_kon_rep_2	2K_sr_TN_kon_rep_2	root	Quercus robur	total RNA	Second harvest date - 8-weeks old plant, meristematic zone of the taproot, medium root, thick root, growing in containers
2K_sr_TN_kon_rep_3	2K_sr_TN_kon_rep_3	root	Quercus robur	total RNA	Second harvest date - 8-weeks old plant, meristematic zone of the taproot, medium root, thick root, growing in containers
2KB_dl_NN_kon_rep_1	2KB_dl_NN_kon_rep_1	root	Quercus robur	total RNA	Second harvest date - 8-weeks old plant, lateral root, long root, growing in containers
2KB_dl_NN_kon_rep_2	2KB_dl_NN_kon_rep_2	root	Quercus robur	total RNA	Second harvest date - 8-weeks old plant, lateral root, long root, growing in containers
2KB_dl_NN_kon_rep_3	2KB_dl_NN_kon_rep_3	root	Quercus robur	total RNA	Second harvest date - 8-weeks old plant, lateral root, long root, growing in containers
2KB_dl_NN_rh_rep_1	2KB_dl_NN_rh_rep_1	root	Quercus robur	total RNA	Second harvest date - 8-weeks old plant, lateral root, long root, growing in rhizotron
2KB_dl_NN_rh_rep_2	2KB_dl_NN_rh_rep_2	root	Quercus robur	total RNA	Second harvest date - 8-weeks old plant, lateral root, long root, growing in rhizotron
2KB_dl_NN_rh_rep_3	2KB_dl_NN_rh_rep_3	root	Quercus robur	total RNA	Second harvest date - 8-weeks old plant, lateral root, long root, growing in rhizotron
2KB_sr_NN_kon_rep_1	2KB_sr_NN_kon_rep_1	root	Quercus robur	total RNA	Second harvest date - 8-weeks old plant, lateral root, medium root, growing in containers
2KB_sr_NN_kon_rep_2	2KB_sr_NN_kon_rep_2	root	Quercus robur	total RNA	Second harvest date - 8-weeks old plant, lateral root, medium root, growing in containers
2KB_sr_NN_kon_rep_3	2KB_sr_NN_kon_rep_3	root	Quercus robur	total RNA	Second harvest date - 8-weeks old plant, lateral root, medium root, growing in containers
2KB_sr_NN_rh_rep_1	2KB_sr_NN_rh_rep_1	root	Quercus robur	total RNA	Second harvest date - 8-weeks old plant, lateral root, medium root, growing in rhizotron
2KB_sr_NN_rh_rep_2	2KB_sr_NN_rh_rep_2	root	Quercus robur	total RNA	Second harvest date - 8-weeks old plant, lateral root, medium root, growing in rhizotron
2KB_sr_NN_rh_rep_3	2KB_sr_NN_rh_rep_3	root	Quercus robur	total RNA	Second harvest date - 8-weeks old plant, lateral root, medium root, growing in rhizotron
2KB_sr_TN_kon_rep_1	2KB_sr_TN_kon_rep_1	root	Quercus robur	total RNA	Second harvest date - 8-weeks old plant, lateral root, medium root, thick root, growing in containers
2KB_sr_TN_kon_rep_2	2KB_sr_TN_kon_rep_2	root	Quercus robur	total RNA	Second harvest date - 8-weeks old plant, lateral root, medium root, thick root, growing in containers
2KB_sr_TN_kon_rep_3	2KB_sr_TN_kon_rep_3	root	Quercus robur	total RNA	Second harvest date - 8-weeks old plant, lateral root, medium root, thick root, growing in containers
2KB_sr_TN_rh_rep_1	2KB_sr_TN_rh_rep_1	root	Quercus robur	total RNA	Second harvest date - 8-weeks old plant, lateral root, medium root, thick root, growing in rhizotron
2KB_sr_TN_rh_rep_2	2KB_sr_TN_rh_rep_2	root	Quercus robur	total RNA	Second harvest date - 8-weeks old plant, lateral root, medium root, thick root, growing in rhizotron
2KB_sr_TN_rh_rep_3	2KB_sr_TN_rh_rep_3	root	Quercus robur	total RNA	Second harvest date - 8-weeks old plant, lateral root, medium root, thick root, growing in rhizotron
3K_dl_NN_kon_rep_1	3K_dl_NN_kon_rep_1	root	Quercus robur	total RNA	Third harvest date – 8-weeks old plant, meristematic zone of the taproot, long root, growing in containers
3K_dl_NN_kon_rep_2	3K_dl_NN_kon_rep_2	root	Quercus robur	total RNA	Third harvest date – 8-weeks old plant, meristematic zone of the taproot, long root, growing in containers
3K_dl_NN_kon_rep_3	3K_dl_NN_kon_rep_3	root	Quercus robur	total RNA	Third harvest date – 8-weeks old plant, meristematic zone of the taproot, long root, growing in containers
3K_dl_NN_rh_rep_1	3K_dl_NN_rh_rep_1	root	Quercus robur	total RNA	Third harvest date – 8-weeks old plant, meristematic zone of the taproot, long root, growing in rhizotron
3K_dl_NN_rh_rep_2	3K_dl_NN_rh_rep_2	root	Quercus robur	total RNA	Third harvest date – 8-weeks old plant, meristematic zone of the taproot, long root, growing in rhizotron
3K_dl_NN_rh_rep_3	3K_dl_NN_rh_rep_3	root	Quercus robur	total RNA	Third harvest date – 8-weeks old plant, meristematic zone of the taproot, long root, growing in rhizotron
3K_dl_TN_kon_rep_1	3K_dl_TN_kon_rep_1	root	Quercus robur	total RNA	Third harvest date – 8-weeks old plant, meristematic zone of the taproot, long root, thick root, growing in containers
3K_dl_TN_kon_rep_2	3K_dl_TN_kon_rep_2	root	Quercus robur	total RNA	Third harvest date – 8-weeks old plant, meristematic zone of the taproot, long root, thick root, growing in containers
3K_dl_TN_kon_rep_3	3K_dl_TN_kon_rep_3	root	Quercus robur	total RNA	Third harvest date – 8-weeks old plant, meristematic zone of the taproot, long root, thick root, growing in containers
3K_dl_TN_rh_rep_1	3K_dl_TN_rh_rep_1	root	Quercus robur	total RNA	Third harvest date – 8-weeks old plant, meristematic zone of the taproot, long root, thick root, growing in rhizotron
3K_dl_TN_rh_rep_2	3K_dl_TN_rh_rep_2	root	Quercus robur	total RNA	Third harvest date – 8-weeks old plant, meristematic zone of the taproot, long root, thick root, growing in rhizotron
3K_dl_TN_rh_rep_3	3K_dl_TN_rh_rep_3	root	Quercus robur	total RNA	Third harvest date – 8-weeks old plant, meristematic zone of the taproot, long root, thick root, growing in rhizotron
3KB_dl_NN_kon_rep_1	3KB_dl_NN_kon_rep_1	root	Quercus robur	total RNA	Third harvest date – 8-weeks old plant, lateral root, long root, growing in containers
3KB_dl_NN_kon_rep_2	3KB_dl_NN_kon_rep_2	root	Quercus robur	total RNA	Third harvest date – 8-weeks old plant, lateral root, long root, growing in containers
3KB_dl_NN_kon_rep_3	3KB_dl_NN_kon_rep_3	root	Quercus robur	total RNA	Third harvest date – 8-weeks old plant, lateral root, long root, growing in containers
K_dl_NN_kon_rep_1	K_dl_NN_kon_rep_1	root	Quercus robur	total RNA	meristematic zone of the taproot, long root, growing in containers
K_dl_NN_kon_rep_2	K_dl_NN_kon_rep_2	root	Quercus robur	total RNA	meristematic zone of the taproot, long root, growing in containers
K_dl_NN_kon_rep_3	K_dl_NN_kon_rep_3	root	Quercus robur	total RNA	meristematic zone of the taproot, long root, growing in containers
K_dl_NN_krh_rep_1	K_dl_NN_krh_rep_1	root	Quercus robur	total RNA	meristematic zone of the taproot, long root, grown in a container and then transferred to a rhizotron
K_dl_NN_krh_rep_2	K_dl_NN_krh_rep_2	root	Quercus robur	total RNA	meristematic zone of the taproot, long root, grown in a container and then transferred to a rhizotron
K_dl_NN_krh_rep_3	K_dl_NN_krh_rep_3	root	Quercus robur	total RNA	meristematic zone of the taproot, long root, grown in a container and then transferred to a rhizotron
K_dl_NN_rh_rep_1	K_dl_NN_rh_rep_1	root	Quercus robur	total RNA	meristematic zone of the taproot, long root, growing in rhizotron
K_dl_NN_rh_rep_2	K_dl_NN_rh_rep_2	root	Quercus robur	total RNA	meristematic zone of the taproot, long root, growing in rhizotron
K_dl_NN_rh_rep_3	K_dl_NN_rh_rep_3	root	Quercus robur	total RNA	meristematic zone of the taproot, long root, growing in rhizotron
K_dl_NT_kon_rep_1	K_dl_NT_kon_rep_1	root	Quercus robur	total RNA	meristematic zone of the taproot, long root, dying root, growing in containers
K_dl_NT_kon_rep_2	K_dl_NT_kon_rep_2	root	Quercus robur	total RNA	meristematic zone of the taproot, long root, dying root, growing in containers
K_dl_NT_kon_rep_3	K_dl_NT_kon_rep_3	root	Quercus robur	total RNA	meristematic zone of the taproot, long root, dying root, growing in containers
K_dl_NT_krh_rep_1	K_dl_NT_krh_rep_1	root	Quercus robur	total RNA	meristematic zone of the taproot, long root, grown in a container and then transferred to a rhizotron
K_dl_NT_krh_rep_2	K_dl_NT_krh_rep_2	root	Quercus robur	total RNA	meristematic zone of the taproot, long root, grown in a container and then transferred to a rhizotron
K_dl_NT_krh_rep_3	K_dl_NT_krh_rep_3	root	Quercus robur	total RNA	meristematic zone of the taproot, long root, grown in a container and then transferred to a rhizotron
K_kr_NN_kon_rep_1	K_kr_NN_kon_rep_1	root	Quercus robur	total RNA	meristematic zone of the taproot, short root, growing in containers
K_kr_NN_kon_rep_2	K_kr_NN_kon_rep_2	root	Quercus robur	total RNA	meristematic zone of the taproot, short root, growing in containers
K_kr_NN_kon_rep_3	K_kr_NN_kon_rep_3	root	Quercus robur	total RNA	meristematic zone of the taproot, short root, growing in containers
K_kr_NN_krh_rep_1	K_kr_NN_krh_rep_1	root	Quercus robur	total RNA	meristematic zone of the taproot, short root, grown in a container and then transferred to a rhizotron
K_kr_NN_krh_rep_2	K_kr_NN_krh_rep_2	root	Quercus robur	total RNA	meristematic zone of the taproot, short root, grown in a container and then transferred to a rhizotron
K_kr_NN_krh_rep_3	K_kr_NN_krh_rep_3	root	Quercus robur	total RNA	meristematic zone of the taproot, short root, grown in a container and then transferred to a rhizotron
K_kr_NN_rh_rep_1	K_kr_NN_rh_rep_1	root	Quercus robur	total RNA	meristematic zone of the taproot, short root, growing in rhizotron
K_kr_NN_rh_rep_2	K_kr_NN_rh_rep_2	root	Quercus robur	total RNA	meristematic zone of the taproot, short root, growing in rhizotron
K_kr_NN_rh_rep_3	K_kr_NN_rh_rep_3	root	Quercus robur	total RNA	meristematic zone of the taproot, short root, growing in rhizotron
K_sr_NN_kon_rep_1	K_sr_NN_kon_rep_1	root	Quercus robur	total RNA	meristematic zone of the taproot, medium root, growing in containers
K_sr_NN_kon_rep_2	K_sr_NN_kon_rep_2	root	Quercus robur	total RNA	meristematic zone of the taproot, medium root, growing in containers
K_sr_NN_kon_rep_3	K_sr_NN_kon_rep_3	root	Quercus robur	total RNA	meristematic zone of the taproot, medium root, growing in containers
K_sr_NN_krh_rep_1	K_sr_NN_krh_rep_1	root	Quercus robur	total RNA	meristematic zone of the taproot, medium root, grown in a container and then transferred to a rhizotron
K_sr_NN_krh_rep_2	K_sr_NN_krh_rep_2	root	Quercus robur	total RNA	meristematic zone of the taproot, medium root, grown in a container and then transferred to a rhizotron
K_sr_NN_krh_rep_3	K_sr_NN_krh_rep_3	root	Quercus robur	total RNA	meristematic zone of the taproot, medium root, grown in a container and then transferred to a rhizotron
K_sr_NN_rh_rep_1	K_sr_NN_rh_rep_1	root	Quercus robur	total RNA	meristematic zone of the taproot, medium root, growing in rhizotron
K_sr_NN_rh_rep_2	K_sr_NN_rh_rep_2	root	Quercus robur	total RNA	meristematic zone of the taproot, medium root, growing in rhizotron
K_sr_NN_rh_rep_3	K_sr_NN_rh_rep_3	root	Quercus robur	total RNA	meristematic zone of the taproot, medium root, growing in rhizotron
K_sr_TT_krh_rep_1	K_sr_TT_krh_rep_1	root	Quercus robur	total RNA	meristemaric zone of the taproot, medium root, thick root, dying root, grown in a container and then transferred to a rhizotron
K_sr_TT_krh_rep_2	K_sr_TT_krh_rep_2	root	Quercus robur	total RNA	meristemaric zone of the taproot, medium root, thick root, dying root, grown in a container and then transferred to a rhizotron
K_sr_TT_krh_rep_3	K_sr_TT_krh_rep_3	root	Quercus robur	total RNA	meristemaric zone of the taproot, medium root, thick root, dying root, grown in a container and then transferred to a rhizotron
K_sr_TT_rh_rep_1	K_sr_TT_rh_rep_1	root	Quercus robur	total RNA	meristematic zone of the taproot, medium root, thick root, dying root, growing in rhizotron
K_sr_TT_rh_rep_2	K_sr_TT_rh_rep_2	root	Quercus robur	total RNA	meristematic zone of the taproot, medium root, thick root, dying root, growing in rhizotron
K_sr_TT_rh_rep_3	K_sr_TT_rh_rep_3	root	Quercus robur	total RNA	meristematic zone of the taproot, medium root, thick root, dying root, growing in rhizotron
KB_dl_NN_kon_rep_1	KB_dl_NN_kon_rep_1	root	Quercus robur	total RNA	lateral root, long root, growing in containers
KB_dl_NN_kon_rep_2	KB_dl_NN_kon_rep_2	root	Quercus robur	total RNA	lateral root, long root, growing in containers
KB_dl_NN_kon_rep_3	KB_dl_NN_kon_rep_3	root	Quercus robur	total RNA	lateral root, long root, growing in containers
KB_dl_NN_krh_rep_1	KB_dl_NN_krh_rep_1	root	Quercus robur	total RNA	lateral root, long root, grown in a container and then transferred to a rhizotron
KB_dl_NN_krh_rep_2	KB_dl_NN_krh_rep_2	root	Quercus robur	total RNA	lateral root, long root, grown in a container and then transferred to a rhizotron
KB_dl_NN_krh_rep_3	KB_dl_NN_krh_rep_3	root	Quercus robur	total RNA	lateral root, long root, grown in a container and then transferred to a rhizotron
KB_dl_NN_rh_rep_1	KB_dl_NN_rh_rep_1	root	Quercus robur	total RNA	lateral root, long root, growing in rhizotron
KB_dl_NN_rh_rep_2	KB_dl_NN_rh_rep_2	root	Quercus robur	total RNA	lateral root, long root, growing in rhizotron
KB_dl_NN_rh_rep_3	KB_dl_NN_rh_rep_3	root	Quercus robur	total RNA	lateral root, long root, growing in rhizotron
KB_dl_NT_kon_rep_1	KB_dl_NT_kon_rep_1	root	Quercus robur	total RNA	lateral root, long root, dying root, growing in containers
KB_dl_NT_kon_rep_2	KB_dl_NT_kon_rep_2	root	Quercus robur	total RNA	lateral root, long root, dying root, growing in containers
KB_dl_NT_kon_rep_3	KB_dl_NT_kon_rep_3	root	Quercus robur	total RNA	lateral root, long root, dying root, growing in containers
KB_sr_NN_kon_rep_1	KB_sr_NN_kon_rep_1	root	Quercus robur	total RNA	lateral root, medium root, growing in containers
KB_sr_NN_kon_rep_2	KB_sr_NN_kon_rep_2	root	Quercus robur	total RNA	lateral root, medium root, growing in containers
KB_sr_NN_kon_rep_3	KB_sr_NN_kon_rep_3	root	Quercus robur	total RNA	lateral root, medium root, growing in containers
KB_sr_NN_rh_rep_1	KB_sr_NN_rh_rep_1	root	Quercus robur	total RNA	lateral root, medium root, growing in rhizotron
KB_sr_NN_rh_rep_2	KB_sr_NN_rh_rep_2	root	Quercus robur	total RNA	lateral root, medium root, growing in rhizotron
KB_sr_NN_rh_rep_3	KB_sr_NN_rh_rep_3	root	Quercus robur	total RNA	lateral root, medium root, growing in rhizotron
KB_sr_TT_krh_rep_1	KB_sr_TT_krh_rep_1	root	Quercus robur	total RNA	lateral root, medium root, thick root, dying root, grown in a container and then transferred to a rhizotron
KB_sr_TT_krh_rep_2	KB_sr_TT_krh_rep_2	root	Quercus robur	total RNA	lateral root, medium root, thick root, dying root, grown in a container and then transferred to a rhizotron
KB_sr_TT_krh_rep_3	KB_sr_TT_krh_rep_3	root	Quercus robur	total RNA	lateral root, medium root, thick root, dying root, grown in a container and then transferred to a rhizotron
SW_dl_NN_kon_rep_1	SW_dl_NN_kon_rep_1	root	Quercus robur	total RNA	elongation zone of the taproot, long root, growing in containers
SW_dl_NN_kon_rep_2	SW_dl_NN_kon_rep_2	root	Quercus robur	total RNA	elongation zone of the taproot, long root, growing in containers
SW_dl_NN_kon_rep_3	SW_dl_NN_kon_rep_3	root	Quercus robur	total RNA	elongation zone of the taproot, long root, growing in containers
SW_dl_NN_krh_rep_1	SW_dl_NN_krh_rep_1	root	Quercus robur	total RNA	elongation zone of the taproot, long root, grown in a container and then transferred to a rhizotron
SW_dl_NN_krh_rep_2	SW_dl_NN_krh_rep_2	root	Quercus robur	total RNA	elongation zone of the taproot, long root, grown in a container and then transferred to a rhizotron
SW_dl_NN_krh_rep_3	SW_dl_NN_krh_rep_3	root	Quercus robur	total RNA	elongation zone of the taproot, long root, grown in a container and then transferred to a rhizotron
SW_dl_NN_rh_rep_1	SW_dl_NN_rh_rep_1	root	Quercus robur	total RNA	elongation zone of the taproot, long root, growing in rhizotron
SW_dl_NN_rh_rep_2	SW_dl_NN_rh_rep_2	root	Quercus robur	total RNA	elongation zone of the taproot, long root, growing in rhizotron
SW_dl_NN_rh_rep_3	SW_dl_NN_rh_rep_3	root	Quercus robur	total RNA	elongation zone of the taproot, long root, growing in rhizotron
SW_dl_NT_kon_rep_1	SW_dl_NT_kon_rep_1	root	Quercus robur	total RNA	elongation zone of the taproot, long root, dying root, growing in containers
SW_dl_NT_kon_rep_2	SW_dl_NT_kon_rep_2	root	Quercus robur	total RNA	elongation zone of the taproot, long root, dying root, growing in containers
SW_dl_NT_kon_rep_3	SW_dl_NT_kon_rep_3	root	Quercus robur	total RNA	elongation zone of the taproot, long root, dying root, growing in containers
SW_dl_NT_krh_rep_1	SW_dl_NT_krh_rep_1	root	Quercus robur	total RNA	elongation zone of the taproot, long root, dying root, grown in a container and then transferred to a rhizotron
SW_dl_NT_krh_rep_2	SW_dl_NT_krh_rep_2	root	Quercus robur	total RNA	elongation zone of the taproot, long root, dying root, grown in a container and then transferred to a rhizotron
SW_dl_NT_krh_rep_3	SW_dl_NT_krh_rep_3	root	Quercus robur	total RNA	elongation zone of the taproot, long root, dying root, grown in a container and then transferred to a rhizotron
SW_sr_NN_kon_rep_1	SW_sr_NN_kon_rep_1	root	Quercus robur	total RNA	elongation zone of raproot, medium root, growing in containers
SW_sr_NN_kon_rep_2	SW_sr_NN_kon_rep_2	root	Quercus robur	total RNA	elongation zone of raproot, medium root, growing in containers
SW_sr_NN_kon_rep_3	SW_sr_NN_kon_rep_3	root	Quercus robur	total RNA	elongation zone of raproot, medium root, growing in containers
SW_sr_NN_rh_rep_1	SW_sr_NN_rh_rep_1	root	Quercus robur	total RNA	elongation zone of the taproot, medium root, growing in rhizotron
SW_sr_NN_rh_rep_2	SW_sr_NN_rh_rep_2	root	Quercus robur	total RNA	elongation zone of the taproot, medium root, growing in rhizotron
SW_sr_NN_rh_rep_3	SW_sr_NN_rh_rep_3	root	Quercus robur	total RNA	elongation zone of the taproot, medium root, growing in rhizotron
SW_sr_NT_rh_rep_1	SW_sr_NT_rh_rep_1	root	Quercus robur	total RNA	elongation zone of the taproot, medium root, dying root, growing in rhizotron
SW_sr_NT_rh_rep_2	SW_sr_NT_rh_rep_2	root	Quercus robur	total RNA	elongation zone of the taproot, medium root, dying root, growing in rhizotron
SW_sr_NT_rh_rep_3	SW_sr_NT_rh_rep_3	root	Quercus robur	total RNA	elongation zone of the taproot, medium root, dying root, growing in rhizotron
SW_sr_TN_krh_rep_1	SW_sr_TN_krh_rep_1	root	Quercus robur	total RNA	elongation zone of the taproot, medium root, thick root, grown in a container and then transferred to a rhizotron
SW_sr_TN_krh_rep_2	SW_sr_TN_krh_rep_2	root	Quercus robur	total RNA	elongation zone of the taproot, medium root, thick root, grown in a container and then transferred to a rhizotron
SW_sr_TN_krh_rep_3	SW_sr_TN_krh_rep_3	root	Quercus robur	total RNA	elongation zone of the taproot, medium root, thick root, grown in a container and then transferred to a rhizotron
SW_sr_TT_krh_rep_1	SW_sr_TT_krh_rep_1	root	Quercus robur	total RNA	elongation zone of the taproot, medium root, thick root, dying root, grown in a container and then transferred to a rhizotron
SW_sr_TT_krh_rep_2	SW_sr_TT_krh_rep_2	root	Quercus robur	total RNA	elongation zone of the taproot, medium root, thick root, dying root, grown in a container and then transferred to a rhizotron
SW_sr_TT_krh_rep_3	SW_sr_TT_krh_rep_3	root	Quercus robur	total RNA	elongation zone of the taproot, medium root, thick root, dying root, grown in a container and then transferred to a rhizotron
